# Supplementary material for: Postponed Dental Visits during the COVID-19 Pandemic and their Correlates. Evidence from the Nationally Representative COVID-19 Snapshot Monitoring in Germany (COSMO)
Source: PubMed Central journal article supplement (PMC7824850; doi:10.3390/healthcare9010050), 2021-01-05
Supplement: healthcare-09-00050-s001.pdf [file healthcare-09-00050-s001.pdf]

**Table S1.** Determinants of postponed dental visits due to the COVID-19 pandemic since March 2020. Findings of multiple multinomial logistic regressions (base outcome: Postponed dental visits).

| <b>Independent variables</b>                                                                                      | <b>No, attended as planned</b> | <b>No examining pending</b> | <b>No, other reasons</b> |
|-------------------------------------------------------------------------------------------------------------------|--------------------------------|-----------------------------|--------------------------|
| Gender: Female (Ref.: Male)                                                                                       | 0.99<br>(0.68 - 1.44)          | 0.65*<br>(0.46 - 0.92)      | 0.81<br>(0.40 - 1.65)    |
| Age category: - 30 to 49 years (Ref.: 18 to 29 years)                                                             | 0.63<br>(0.36 - 1.11)          | 0.75<br>(0.44 - 1.27)       | 0.73<br>(0.25 - 2.15)    |
| - 50 to 64 years                                                                                                  | 0.92<br>(0.50 - 1.69)          | 1.16<br>(0.66 - 2.06)       | 0.86<br>(0.26 - 2.77)    |
| - 65 years and over                                                                                               | 2.01+<br>(0.96 - 4.24)         | 2.69**<br>(1.33 - 5.44)     | 0.96<br>(0.21 - 4.32)    |
| Children (under 18 years): Yes (Ref.: Absence of children under 18 years)                                         | 0.76<br>(0.48 - 1.22)          | 0.87<br>(0.57 - 1.33)       | 0.99<br>(0.42 - 2.33)    |
| Education: General qualification for university entrance (Ref.: absence of qualification for university entrance) | 0.85<br>(0.57 - 1.25)          | 0.84<br>(0.59 - 1.21)       | 0.96<br>(0.46 - 2.02)    |
| Town size: - Medium sized town (20.001 – 100.000) (Ref.: municipality/small town (1-20.000))                      | 0.79<br>(0.49 - 1.26)          | 0.99<br>(0.64 - 1.53)       | 0.32*<br>(0.10 - 0.99)   |
| - Small city (100.001 – 500.000)                                                                                  | 0.82<br>(0.46 - 1.47)          | 0.97<br>(0.57 - 1.66)       | 1.01<br>(0.38 - 2.72)    |
| - Big city (> 500.000)                                                                                            | 0.59*<br>(0.35 - 0.98)         | 0.72<br>(0.45 - 1.14)       | 0.57<br>(0.22 - 1.48)    |
| Region: East Germany (Ref.: West Germany)                                                                         | 1.52<br>(0.88 - 2.64)          | 1.13<br>(0.67 - 1.92)       | 0.26+<br>(0.06 - 1.21)   |
| Cases/100,000 population: Above median (Ref.: below median)                                                       | 1.20<br>(0.80 - 1.82)          | 1.29<br>(0.88 - 1.89)       | 0.72<br>(0.35 - 1.50)    |
| Relationship/Marriage: Yes (Ref.: no partnership/marriage)                                                        | 0.86<br>(0.52 - 1.41)          | 0.83<br>(0.52 - 1.32)       | 1.24<br>(0.46 - 3.30)    |
| Living situation: At least 2 individuals in the same household (Ref.: living alone)                               | 1.10<br>(0.64 - 1.89)          | 1.08<br>(0.65 - 1.78)       | 1.19<br>(0.41 - 3.42)    |
| Migration background: Yes (Ref.: no migration background)                                                         | 1.30<br>(0.76 - 2.21)          | 1.10<br>(0.66 - 1.81)       | 1.10<br>(0.40 - 3.01)    |
| Self-employment: Yes (Ref.: not self-employed)                                                                    | 1.61<br>(0.86 - 3.03)          | 1.08<br>(0.59 - 2.00)       | 0.99<br>(0.27 - 3.66)    |
| Chronic disease: Yes (Ref.: no chronic diseases)                                                                  | 0.79<br>(0.53 - 1.19)          | 0.87<br>(0.60 - 1.27)       | 1.70<br>(0.80 - 3.63)    |

|                                                                            |                          |                            |                        |
|----------------------------------------------------------------------------|--------------------------|----------------------------|------------------------|
| Affect: COVID-19 infection (higher values correspond to higher affect)     | 0.72**<br>(0.58 - 0.89)  | 0.74**<br>(0.61 - 0.91)    | 0.78<br>(0.52 - 1.18)  |
| Severity: COVID-19 infection (higher values correspond to higher severity) | 0.95<br>(0.82 - 1.11)    | 0.92<br>(0.80 - 1.06)      | 0.96<br>(0.71 - 1.28)  |
| Constant                                                                   | 7.45**<br>(1.80 - 30.81) | 14.94***<br>(3.93 - 56.77) | 3.69<br>(0.22 - 62.59) |
| Observations                                                               | 974                      | 974                        | 974                    |
| R <sup>2</sup>                                                             | 0.04                     | 0.04                       | 0.04                   |

Odds ratios are reported; 95% confidence intervals in parentheses; \*\*\* p<0.001, \*\* p<0.01, \* p<0.05, + p<0.10.
